# Supplementary material
Source: PubMed Central journal article supplement (PMC3091968)
Supplement: NIHMS265395-supplement-supplementary_table_1.pdf [file NIHMS265395-supplement-supplementary_table_1.pdf]

**Supplementary Table 1: Mean (SD) measures of body composition in non-diabetic men and women before and after weight-loss**

|                                                                              | WOMEN                           |                                  |                                     | MEN                             |                                  |                                     |
|------------------------------------------------------------------------------|---------------------------------|----------------------------------|-------------------------------------|---------------------------------|----------------------------------|-------------------------------------|
|                                                                              | Baseline <sup>a</sup><br>(n=40) | Follow-up <sup>a</sup><br>(n=37) | Mean Change<br>(95%CI) <sup>b</sup> | Baseline <sup>a</sup><br>(n=48) | Follow-up <sup>a</sup><br>(n=44) | Mean Change<br>(95%CI) <sup>b</sup> |
| Abdominal Visceral Adipose Tissue (cm <sup>3</sup> / 15 cm) <sup>c</sup>     | 2852 (1085.2)                   | 2367 (1020)                      | -466<br>(-561,-371)                 | 4807 (1148)                     | 3864 (1286)                      | -906<br>(-1091,-721)                |
| Appendicular Lean Mass (kg)                                                  | 20.4 (3.4)                      | 19.4 (3.2)                       | -1.0<br>(-1.3,-0.7)                 | 29.6 (3.4)                      | 28.4 (3.3)                       | -1.2<br>(-1.5,-0.9)                 |
| Total Mass (kg)                                                              | 89.3 (14.5)                     | 83.8(15.1)                       | -5.8<br>(-6.8,-4.7)                 | 102.8(13.3)                     | 95.9(13.5)                       | -6.8<br>(-8.1,-5.4)                 |
| Fat Mass (kg)                                                                | 38.8(8.5)                       | 35.3(9.3)                        | -3.8<br>(-4.6,-3.0)                 | 32.5(9.1)                       | 27.9 (9.3)                       | -4.5<br>(-5.5,-3.6)                 |
| Abdominal Subcutaneous Adipose Tissue (cm <sup>3</sup> / 15 cm) <sup>c</sup> | 5391 (1543)                     | 4807 (1675)                      | -669<br>(-811,-526)                 | 3932 (1634)                     | 3388 (1557)                      | -531<br>(-676,-386)                 |
| Thigh Intermuscular Adipose Tissue (cm <sup>3</sup> / 5 cm) <sup>d</sup>     | 61.8 (41.1)                     | 56 (43.9)                        | -4.9<br>(-9.6,-0.1)                 | 66 (41.9)                       | 55 (38.5)                        | -10.7<br>(-14.6,-6.8)               |
| Thigh Subcutaneous Adipose Tissue(cm <sup>3</sup> / 5 cm) <sup>d</sup>       | 2041 (531)                      | 1866 (566)                       | -199<br>(-259,-139)                 | 1081 (465)                      | 950 (435)                        | -125<br>(-162,-89)                  |
| Pericardial Adipose Tissue (cm <sup>3</sup> / 4.5 cm)                        | 101.9 (36.6)                    | 95.2 (33.3)                      | -6.5<br>(-9.3,-3.8)                 | 145.2 (44.5)                    | 134.7 (48.2)                     | -9.8<br>(-16.2,-3.5)                |
| Lean Mass (kg)                                                               | 48.3 (6.9)                      | 46.4 (6.6)                       | -2.0<br>(-2.5,-1.5)                 | 67.4 (6.8)                      | 65.1 (6.3)                       | -2.3<br>(-2.9,-1.6)                 |
| Thigh Muscle Volume (cm <sup>3</sup> / 5 cm) <sup>d</sup>                    | 1094 (153)                      | 1050 (140)                       | -46<br>(-58,-34)                    | 1577 (200)                      | 1508 (190)                       | -65<br>(-81,-50)                    |
| Left Leg muscle attenuation (HU)                                             | 48.2 (7.6)                      | 46.3 (7.5)                       | -1.8<br>(-3.5,-0.1)                 | 50.4 (5.9)                      | 52.5 (5.6)                       | 2.1<br>(0.7,3.5)                    |

|                                   |             |            |                   |            |            |                    |
|-----------------------------------|-------------|------------|-------------------|------------|------------|--------------------|
| Right Leg muscle attenuation (HU) | 48.7 (7.1)  | 46.8 (6.2) | -1.7<br>(-3,-0.4) | 49.3 (5.7) | 50.9 (5.7) | 1.5<br>(0.1,2.9)   |
| Liver attenuation (HU)            | 57.5 (12.3) | 61.9 (8)   | 4.5<br>(2.3,6.7)  | 58.8 (10)  | 57.7 (9.2) | -1.2<br>(-3.2,0.8) |

<sup>a</sup> Baseline and Follow-Up means and standard deviations are unadjusted for other factors.

<sup>b</sup> The overall estimate of change was obtained as a contrast taking the average of the four group means adjusted for the baseline measurement. The analysis of covariance model used to obtain the contrast of the 4 group means contained main effects for each intervention and the interaction term between interventions.

<sup>c</sup> The volumes of abdominal visceral, subcutaneous, and intermuscular fat were measured in a 15 cm section of the abdomen centered at the junction of the lumbar 4<sup>th</sup> and 5<sup>th</sup> vertebra as demonstrated on the lateral scout.

<sup>d</sup> Thigh muscle and adipose tissue was measured using a 5 cm section of the thigh centered at the junction of the proximal and middle third of the femur.
